# Supplementary material for: Atypical APC/C‐dependent degradation of Mcl‐1 provides an apoptotic timer during mitotic arrest
Source: PubMed Central journal article supplement (PMC6120658; doi:10.15252/embj.201796831), 2018-07-09

**Figure 1**

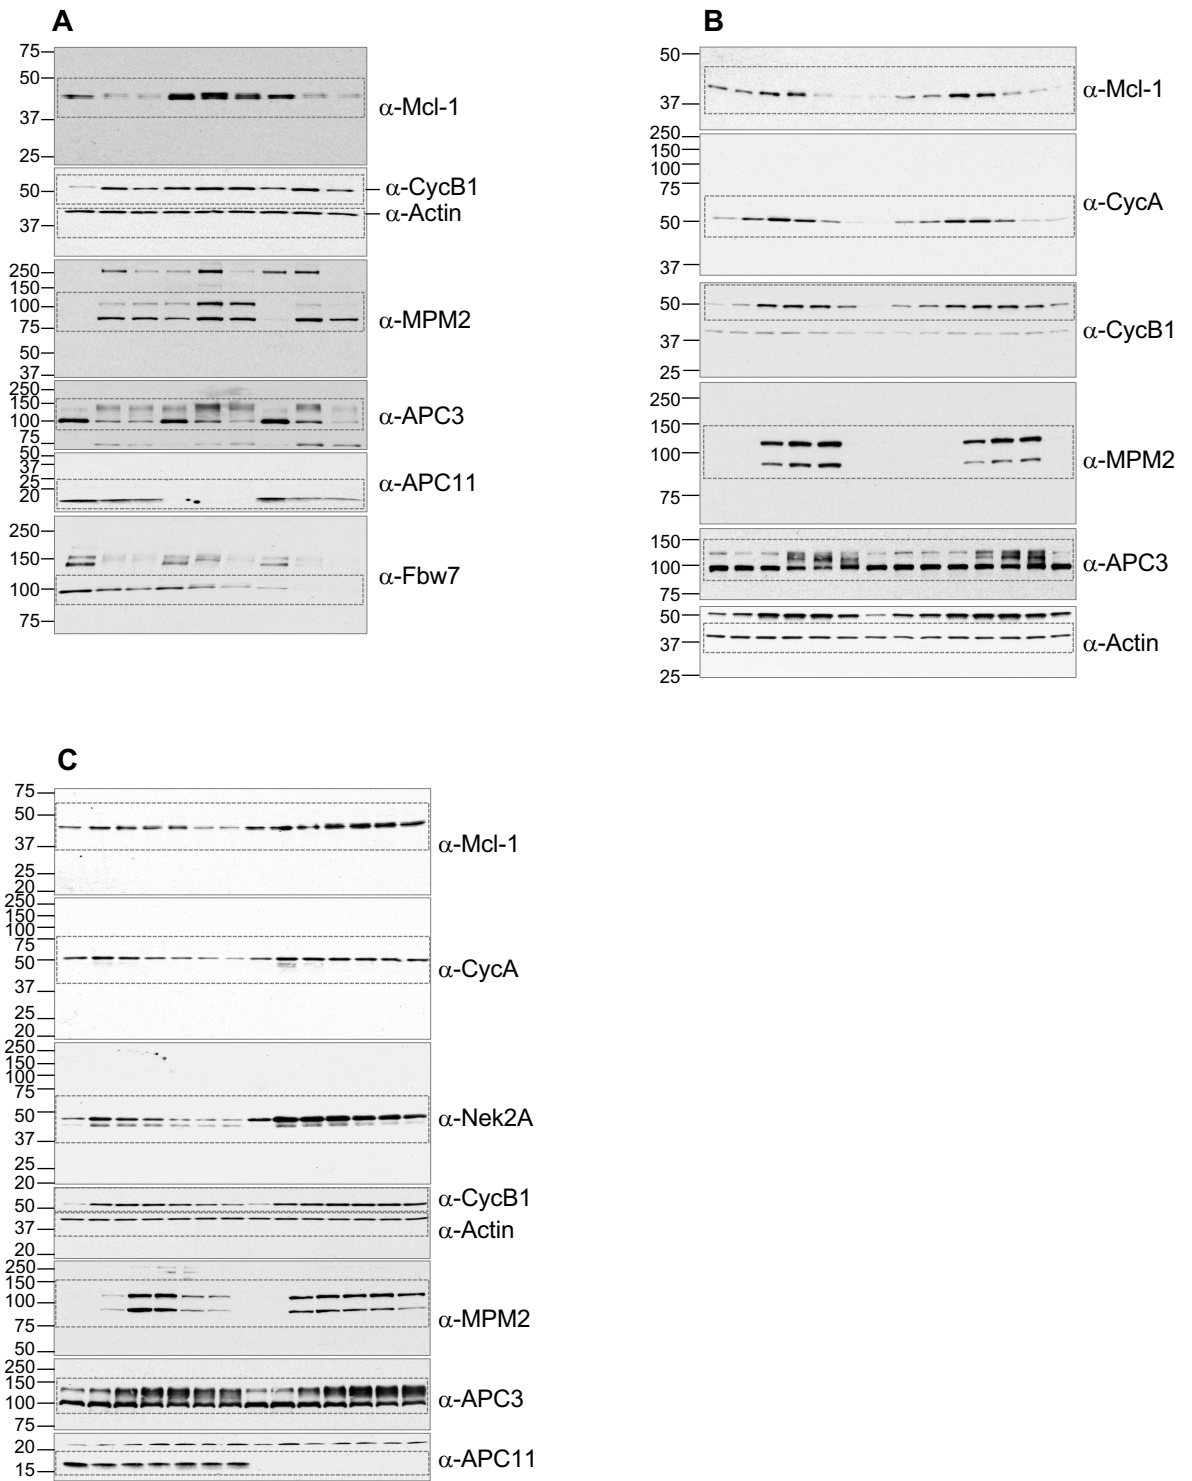

Supplement: EMBJ-37-e96831-s002.pdf [file EMBJ-37-e96831-s002.pdf]
